# Supplementary material for: Highly Efficient A-to-G Editing in PFFs via Multiple ABEs
Source: MDPI journal article supplement (doi:10.3390/genes14040908), 2023-04-13
Supplement: s1 [file s1]

## **Supplementary information**

### **Highly efficient A-to-G editing in PFFs via multiple ABE**

Qiqi Jing<sup>1</sup>, Haoyun Jiang<sup>1</sup>, Yaya Liao<sup>1</sup>, Qiang Yang<sup>1</sup>, Weiwei Liu<sup>1\*</sup>, Yuyun Xing<sup>1\*</sup>

<sup>1</sup>State Key Laboratory of Pig Genetic Improvement and Production Technology,  
Jiangxi Agricultural University, Nanchang 330045, China

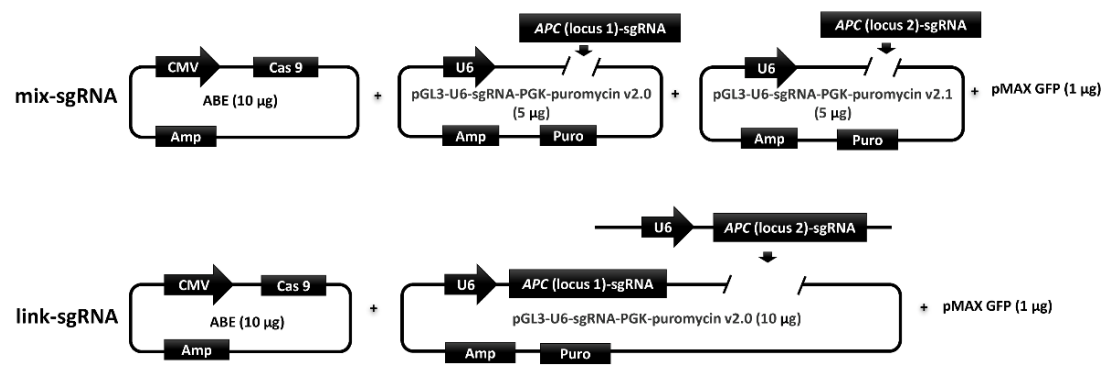

**Figure S1:** The schematic diagrams of mix-sgRNA and link-sgRNA strategies.

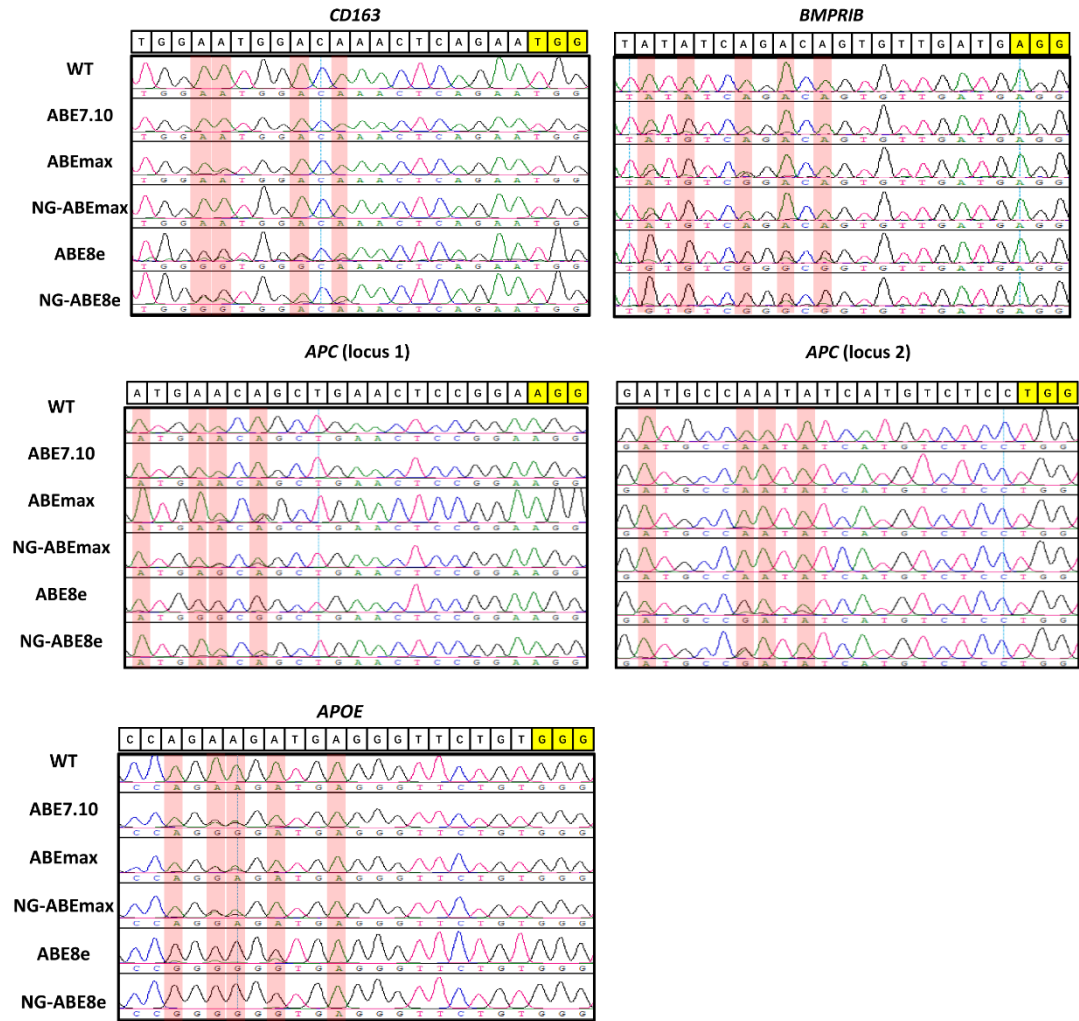

**Figure S2:** Representative sanger sequencing chromatograms of PFFs transfected with ABEs targeting *CD163*, *BMPR1B*, *APC* and *APOE* loci.

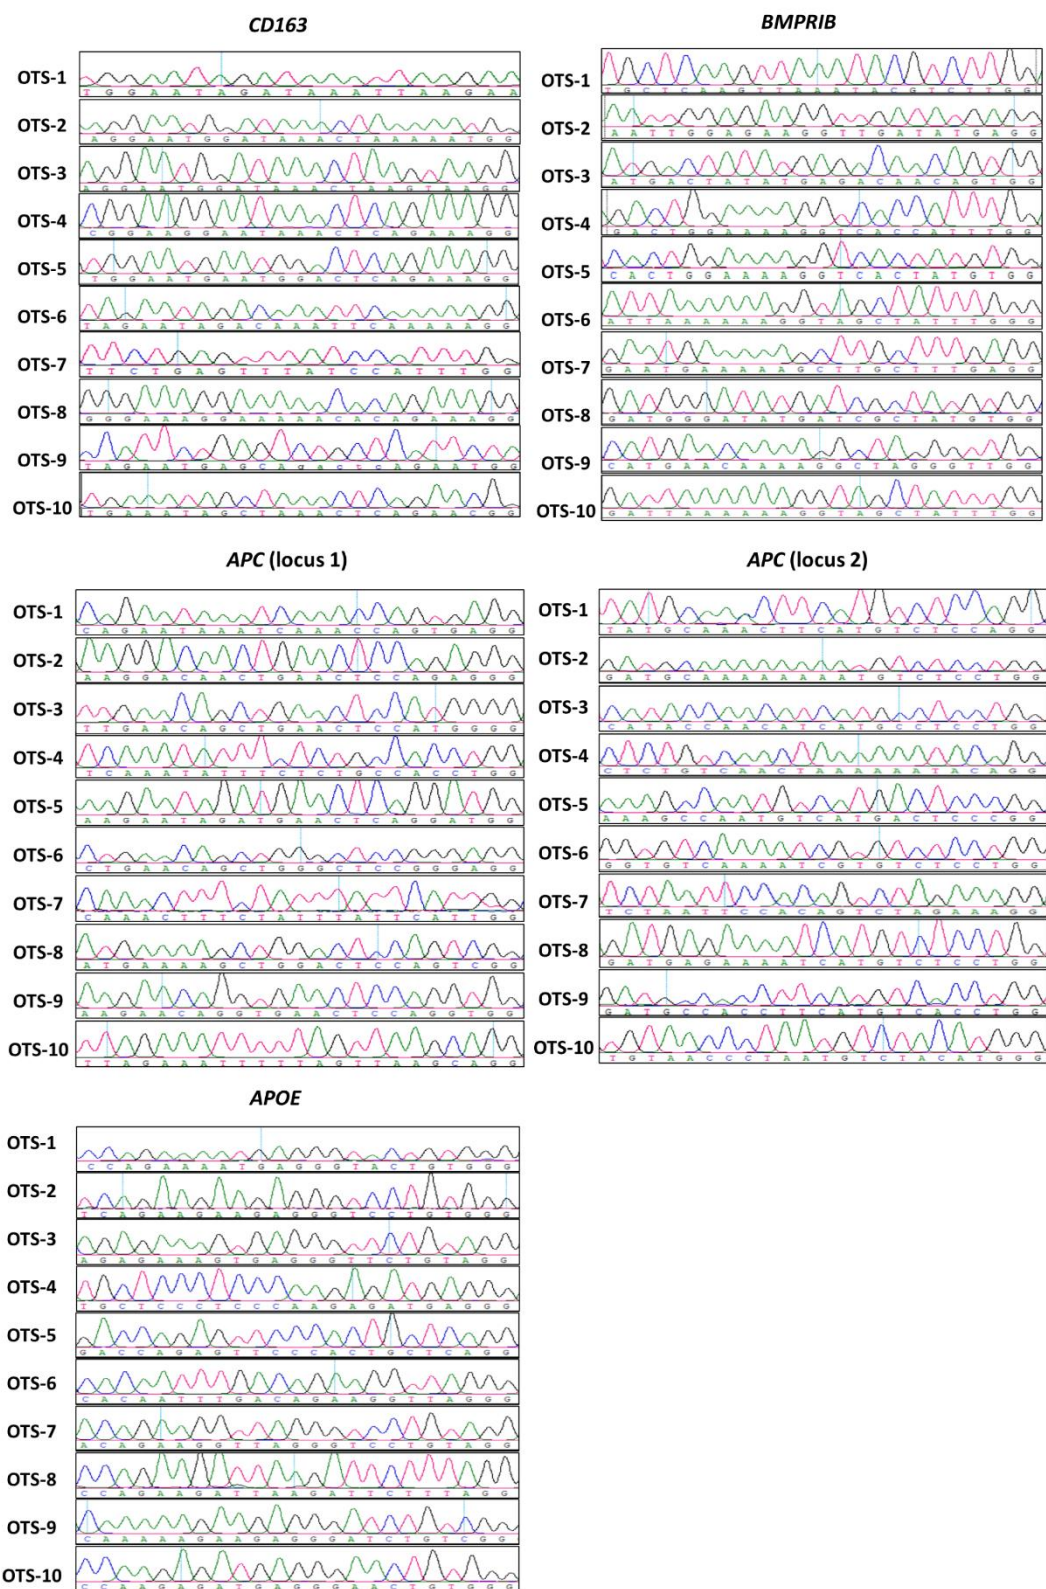

**Figure S3:** Representative sequencing chromatograms of top 10 predicted OTS for each sgRNA.

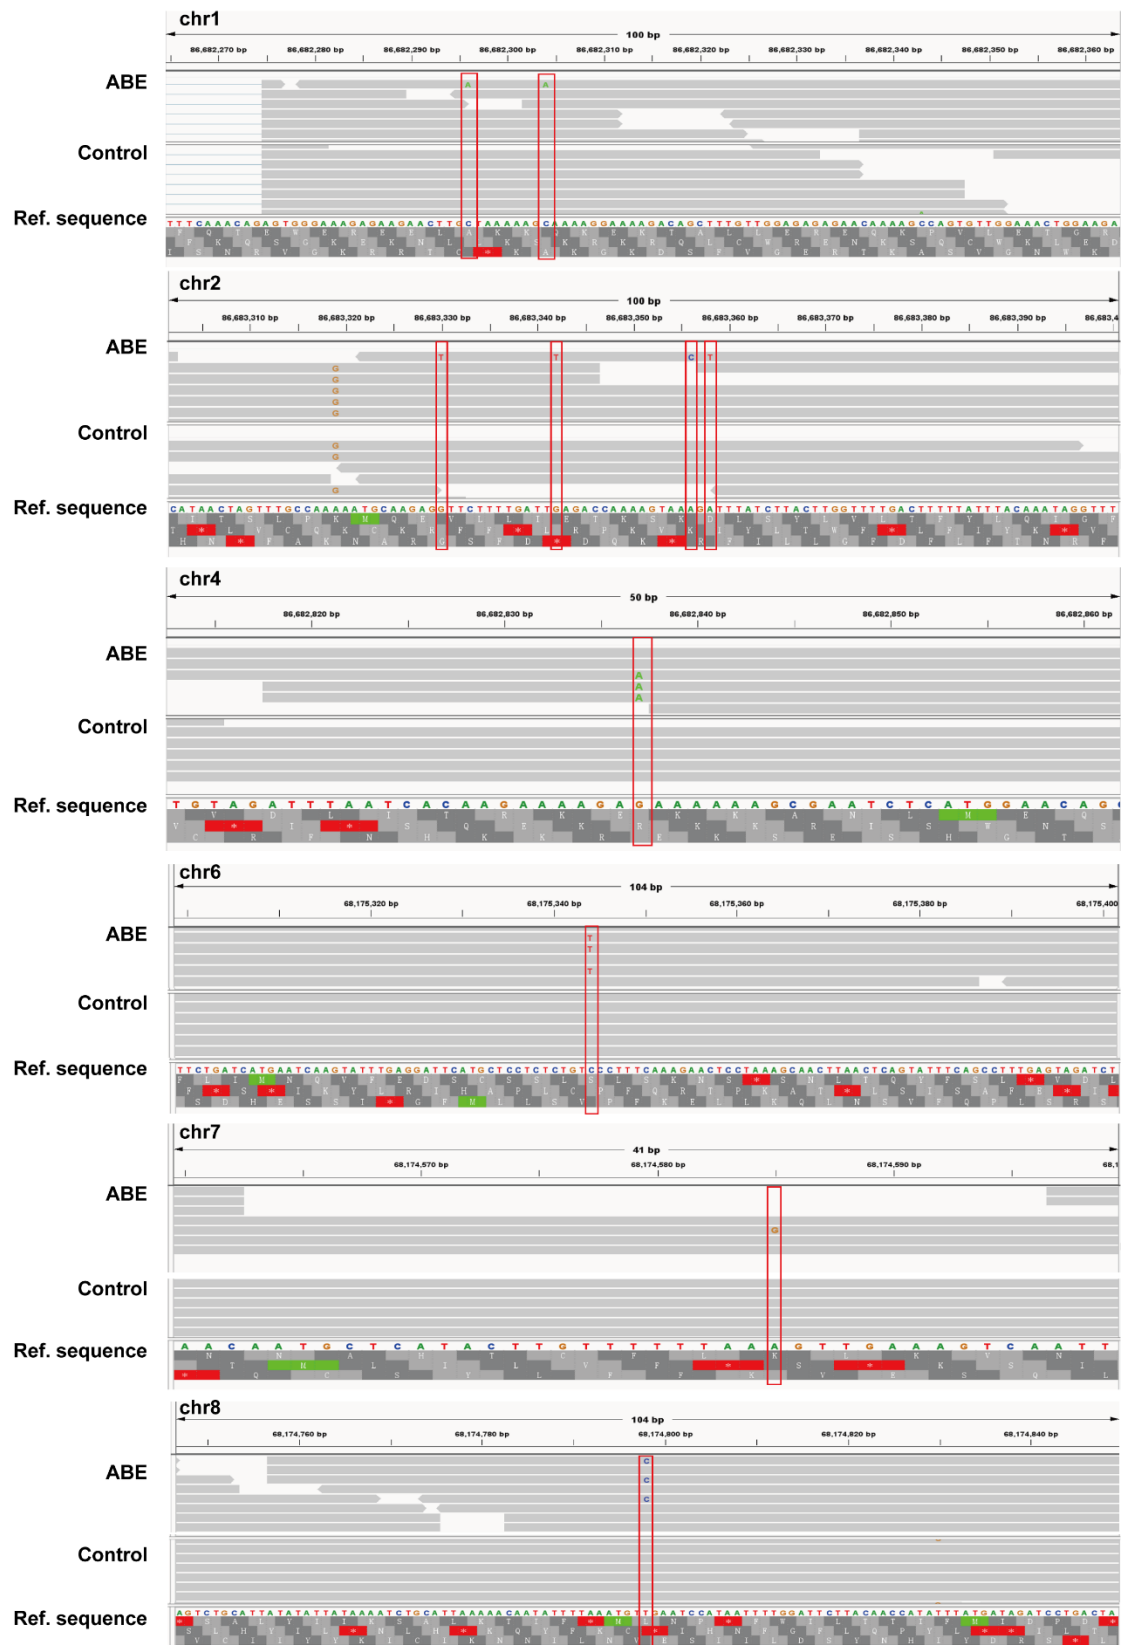

**Figure S4:** Comparison situation of RNA editing sites between RNA-seq reads and reference genome sequence. The red box represents the RNA editing sites identified.

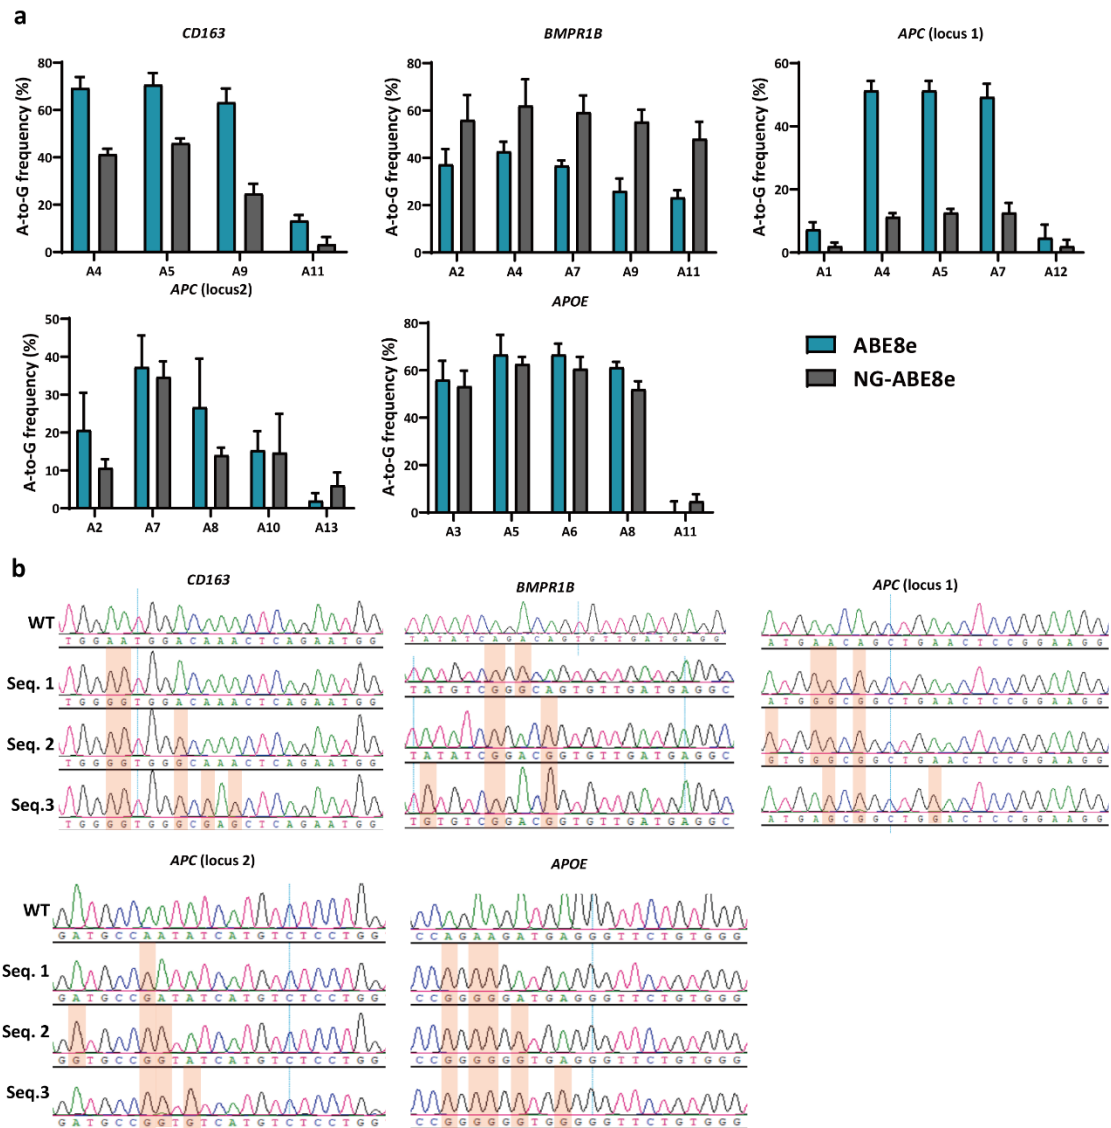

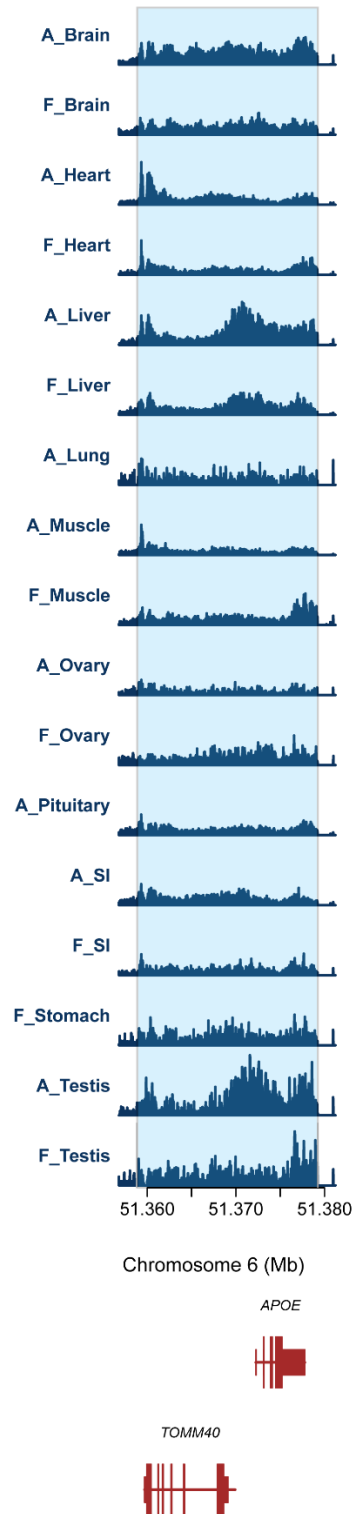

**Figure S6:** Distribution of H3K27ac modification in chromosome 6. Shaded areas indicate the H3K27ac modification. A: Adult; F: Fetal.
