# Supplementary material for: Highly Efficient A-to-G Editing in PFFs via Multiple ABEs
Source: Genes (Basel). 2023 Apr 13;14(4):908. doi: 10.3390/genes14040908 (PMC10137487; doi:10.3390/genes14040908)
Supplement: Supplementary file 1 [file genes-14-00908-s001.zip › supplementary table S1.xlsx]

## Sheet: Sheet1
Table S1 Primers used for PCR and qRT-PCR
Gene	Primer Name	Primer Sequences	Amplicom (bp)
Primer for PCR
BMPRⅠB	BMPR1b-Site-F	F: TGGGGAAGTTTGGATGGGAA	358 bp
	BMPR1b-Site-R	R: ACTCCCAGCCCACATTCATT
CD163	CD163-Site-F	F: CATGGGTGTGAAAGGGAAGC	354 bp
	CD163-Site-R	R: TGCCTTTTCCCTGTTACTTCT
APC (locus 1)	APC (locus 1)-Site-F	F: CTCTACTGCCCACTCACACG	551 bp
	APC (locus 1)-Site-R	R: CATTGGCTGCTCTTGACCT
APC (locus 2)	APC (locus 2)-Site-F	F: TCAGCCAGAAATCCTAAAGACC	348 bp
	APC (locus 2)-Site-R	R: GGCATCAAAAGCATAGTCACC
APC	APC-Dual-F	F: TCAGCCAGAAATCCTAAAGACC	1264 bp
	APC-Dual-R	R: AGGTCAAGAGCAGCCAATG
APOE	APOE-Site-F	F: GGGAGAGAGGGAAGGCTTTT	543 bp
	APOE-Site-R	R: TCTTAACCTGCTGAGCCACA
Primer for qRT-PCR
APOE	APOE-RT-PCR-F	F: GTTCTGTGGGTTGCTTTGGT	181 bp
	APOE-RT-PCR-R	R: TCCTGCACTTGGTCAGACAG
β-actin	β-actin-Site-F	F: ACAGGATGCAGAAGGAGATCAC	157 bp
	β-actin-Site-R	R: GGAGGCGCGATGATCTTG
