# Supplementary material for: Highly Efficient A-to-G Editing in PFFs via Multiple ABEs
Source: Genes (Basel). 2023 Apr 13;14(4):908. doi: 10.3390/genes14040908 (PMC10137487; doi:10.3390/genes14040908)
Supplement: Supplementary file 1 [file genes-14-00908-s001.zip › supplementary table S2.xlsx]

## Sheet: Sheet1
Table S2. Primers for the detection of potential OTS
No.	Sequence (5'-3')	Chromosome	Primer Name	Primer sequence
1	TGGAATAGATAAATTAAGAA	Chr 4	CD163-OTS1-F	F: AGTCCCTGGAAACCACCACG
			CD163-OTS1-R	R: GTTGTCACCTGGCCTGGGAA
2	AGGAATGGATAAACTAAAA	Chr 8	CD163-OTS2-F	F: TGGAGTGATTACAGAGGCCCA
			CD163-OTS2-R	R: ACTGAGTGCATGGTGGCATT
3	AGGAATGGATAAACTAAGTA	Chr 4	CD163-OTS3-F	F: GCAGGTCACGATTTTATTCTCTTCC
			CD163-OTS3-R	R: AGGGATATTTGAGGAGTGCACAGA
4	CGGAAGGAATAAACTCAGA	Chr 9	CD163-OTS4-F	F: TGCCTTGCCACTACAGGGAC
			CD163-OTS4-R	R: AAGTTGCAGCCTTGGCTTGC
5	TGGAATGAATGGACTCAGAA	Chr 3	CD163-OTS5-F	F: GCCCGCCTCCATAACATTGC
			CD163-OTS5-R	R: CCATAGGCTGCTGTGGGTCA
6	TAGAATAGACAAATTCAAAA	Chr 18	CD163-OTS6-F	F: ACCCAAGTGTCCATCAACAGGT
			CD163-OTS6-R	R: TCTCAGACTCTGGAAACTGCCA
7	TTCTGAGTTTATCCATTTGG	Chr 5	CD163-OTS7-F	F: CCTGTGCGGGTTGAGGAGAA
			CD163-OTS7-R	R: AGGTCCAGATTGCAGGCCTC
8	GGGAAAGGAAAAACACAGA	Chr 13	CD163-OTS8-F	F: TCTACACCACAGCCACAGCC
			CD163-OTS8-R	R: GCAGAGAGAGAGATGAAGAGAGA
9	TAGAATGAGCAGACTCAGAA	Chr 10	CD163-OTS9-F	F: TCTGCTTTGGTGAGTTGTCTGT
			CD163-OTS9-R	R: CCAAAGACATGATGAACGAACTGA
10	TGAAATAGCTAAACTCAGAA	Chr 6	CD163-OTS10-F	F: CGTCTGCGACCTGTACCACA
			CD163-OTS10-R	R: AGAACTTGGCCTACAGACACACA
11	TGCTCAAGTTAAATACGTCT	Chr 1	BMPRⅠB-OTS1-F	F: TTGGGGTCTAATCGGAGCTA
			BMPRⅠB-OTS1-R	R: ATTTTGCCAGCCATGAGTTC
12	AATTGGAGAAGGTTGATATG	Chr 9	BMPRⅠB-OTS2-F	F: CAGCTGCCTCTAATCCCATC
			BMPRⅠB-OTS2-R	R: CAGGTTGCTTGGTTGGAAAT
13	ATGACTATATGAGACAACAG	Chr 12	BMPRⅠB-OTS3-F	F: ACCCGACAGTGAACGAAGAT
			BMPRⅠB-OTS3-R	R: GTTGCTGTGGCTGTGGTGTA
14	GACTGGAAAAGGTCACCATT	Chr 16	BMPRⅠB-OTS4-F	F: CACCTGGATTTCACACGTGCT
			BMPRⅠB-OTS4-R	R: AGCTCAGCAGTGGTCATGCA
15	CACTGGAAAAGGTCACTATG	Chr 1	BMPRⅠB-OTS5-F	F: GCTGTAGGAGTGGCCCAAGAAATG
			BMPRⅠB-OTS5-R	R: GCTGTAGGAGTGGCCCAAGAAATG
16	ATTAAAAAAGGTAGCTATTT	Chr 10	BMPRⅠB-OTS6-F	F: AGCCTACCCCACAGCCACAG
			BMPRⅠB-OTS6-R	R: ATTTCACTTGCCCCATAGCGATCC
17	GAATGAAAAAGCTTGCTTTG	Chr 1	BMPRⅠB-OTS7-F	F: TCTTGCCTCCAGGTCCTCCT
			BMPRⅠB-OTS7-R	R: CACTGCTCACCCTTCCACCA
18	GATGGGATATGATCGCTATG	Chr 4	BMPRⅠB-OTS8-F	F: CTGTGCCACCCAGCTCTTCT
			BMPRⅠB-OTS8-R	R: CATGGGTGTCTGTGCATGCC
19	CATGAACAAAAGGCTAGGGT	Chr 1	BMPRⅠB-OTS9-F	F: GGCAATGAGAGCAGGTCAGG
			BMPRⅠB-OTS9-R	R: TCCTGAGGTGGCAAGTACATCA
20	GATTAAAAAAGGTAGCTATT	Chr 9	BMPRⅠB-OTS10-F	F: GAGAGCAGGTCAGGATGAGG
			BMPRⅠB-OTS10-R	R: TTCCTGAGGTGGCAAGTACA
21	CAGAATAAATCAAACCAGTG	Chr 1	APC (locus 1)-OTS1-F	F: TTTGGGCAAGGACACCGGAA
			APC (locus 1)-OTS1-R	R: TGCATACTTCCCCTCACTTGTCT
22	AAGGACAACTGAACTCCAGG	Chr 18	APC (locus 1)-OTS2-F	F: TGCTCCCTCTTCACCTGCTG
			APC (locus 1)-OTS2-R	R: AGGTCATGTAAGGCTTGGGCA
23	TTGAACAGCTGAACTCCATG	Chr 8	APC (locus 1)-OTS3-F	F: CACCAAGCCCCTCCCCTAAA
			APC (locus 1)-OTS3-R	R: GCAACGGGCTTCTTTCTACCT
24	TCAAATATTTCTCTGCCACC	Chr 18	APC (locus 1)-OTS4-F	F: ATTTCTTGGGCCGCTCCTGA
			APC (locus 1)-OTS4-R	R: AGCTACAGCAACCGCCAGAT
25	AAGAATAGATGAACTCAGGA	Chr 5	APC (locus 1)-OTS5-F	F: GAGTATCTGGCAGTAAACAGGTGT
			APC (locus 1)-OTS5-R	R: ACAGATGACTGACTGACTATTGGGA
26	CTGAACAGCTGGGCTCCGGG	Chr 6	APC (locus 1)-OTS6-F	F: GCGCAATCCTCCCTCTTCCT
			APC (locus 1)-OTS6-R	R: CTGCGCCACAATGGGAACTC
27	CAAACTTTCTATTTATTCAT	Chr 7	APC (locus 1)-OTS7-F	F: TGGTGTGACATCCAGCAGGG
			APC (locus 1)-OTS7-R	R: GCTGAAGAATGCTGACTATACAGAAC
28	ATGAAAAGCTGGACTCCAGT	Chr 15	APC (locus 1)-OTS8-F	F: GGATCAGAGGGTGCCCAGTT
			APC (locus 1)-OTS8-R	R: GCTACCGACTGCCAGTCTGT
29	AAGAACAGGTGAACTCCAGG	Chr 16	APC (locus 1)-OTS9-F	F: CAGGCCAGCAGTCCTTCAGT
			APC (locus 1)-OTS9-R	R: AGGTTGTTGGGAGGCAGCAA
30	TTAGAAATTTTTAGTTAAGC	Chr 4	APC (locus 1)-OTS10-F	F: TGCATCCGTCCATCTCACCC
			APC (locus 1)-OTS10-R	R: AAGAGATGCGCGGAAAGGGT
31	TATGCAAACTTCATGTCTCC	Chr 13	APC (locus 2)-OTS1-F	F: GCCATAGTTCGCTGACCCCT
			APC (locus 2)-OTS1-R	R: TGCCAGCTCCACCATGAAGA
32	GATGCAAAAAAAATGTCTCC	Chr 2	APC (locus 2)-OTS2-F	F: AAACTCTGCCAGGGTGCCTT
			APC (locus 2)-OTS2-R	R: CCCATTGTTGCTTCAGGGCC
33	CATACCAACATCATGCCTCC	Chr 15	APC (locus 2)-OTS3-F	F: ACCCTCTACAGACACTCGAGC
			APC (locus 2)-OTS3-R	R: TGTCAGACTATTCATCAGTCACTCC
34	CTCTGTCAACTAAAAAATAC	Chr 4	APC (locus 2)-OTS4-F	F: ATGCTGCAGGTATGGCCCAA
			APC (locus 2)-OTS4-R	R: CGAGGCCAGGGATTGAACCT
35	AAAGCCAATGTCATGACTCC	Chr 9	APC (locus 2)-OTS5-F	F: TGCAGCTTGGATCCCACACT
			APC (locus 2)-OTS5-R	R: TGCCTTGCATATAGTTGGCTCTCA
36	GGTGTCAAAATCGTGTCTCC	Chr 6	APC (locus 2)-OTS6-F	F: AATGCTCCCGGGGACTCTTG
			APC (locus 2)-OTS6-R	R: GAGTCAGGGCAGCAAGGTGA
37	TCTAATTCCACAGTCTAGAA	Y	APC (locus 2)-OTS7-F	F: GGATCGAACCTGCGTCCTCA
			APC (locus 2)-OTS7-R	R: CAGCTGCAACTCATGAGCGG
38	GATGAGAAAATCATGTCTCC	X	APC (locus 2)-OTS8-F	F: GGATCGAACCTGCGTCCTCA
			APC (locus 2)-OTS8-R	R: CAGCTGCAACTCATGAGCGG
39	GATGCCACCTTCATGTCACC	Chr 1	APC (locus 2)-OTS9-F	F: TAGGAACTGGCGGCTACTGC
			APC (locus 2)-OTS9-R	R: CCTGTCACCCCGTGGTTCTT
40	TGTAACCCTAATGTCTACAT	Chr 1	APC (locus 2)-OTS10-F	F: ACCCCCTTGACCTTCCTCCT
			APC (locus 2)-OTS10-R	R: GCGGCCTCACCATTTATCGC
41	CCAGAAAATGAGGGTACTGT	Chr 1	APOE-OTS1-F	F: CAATGGGATGTTTGGCCTCT
			APOE-OTS1-R	R: GCGAAAGCTCTCCAAAAAGG
42	TCAGAAGAAGAGGGTCCTGT	Chr 10	APOE-OTS2-F	F: AGGAAAGGAAGCTGGAGGCAG
			APOE-OTS2-R	R: ATGGCCAGTATGGTTTATGCAGAG
43	AGAGAAAGTGAGGGTTCTGT	Chr 10	APOE-OTS3-F	F: ATCATCCCGGACTGAGGACAG
			APOE-OTS3-R	R: AGCTCCTCAAATTGGAGCTGGA
44	TGCTCCCTCCCAAGAGATGA	Chr 10	APOE-OTS4-F	F: TCCAAAGTTAGGAAGCTGTTATTGG
			APOE-OTS4-R	R: TGGAGTAGATGGGCAAACTGC
45	GACCAGAGTTCCCACTGCTC	Chr 13	APOE-OTS5-F	F: ATCCCTGGTGGCAGAGAGAG
			APOE-OTS5-R	R: CCTCAGCAGCCCAAGATGTC
46	CACAATTTGACAGAAGGTTA	Chr 6	APOE-OTS6-F	F: CCGTCGAGGAGATGCTGTTG
			APOE-OTS6-R	R: AGGAGACAGTTGCCCACACA
47	ACAGAAGGTTAGGGTCCTGT	Chr 1	APOE-OTS7-F	F: TCCTGCAAGATGAAGCCTGAA
			APOE-OTS7-R	R: AGACATAGAGGCTGGAAGAGCA
48	CCAGAAGATTAAGATTCTTT	Chr 11	APOE-OTS8-F	F: TCAGCTTCCTCATCGCAATAACT
			APOE-OTS8-R	R: CACTCAGCTGGCAATATGTGTT
49	CAAAAAGAAGAGGGATCTGT	X	APOE-OTS9-F	F: GGGTTAAGGATCTGGCGTTGC
			APOE-OTS9-R	R: CCCCATGCTTTCTCTGGCA
50	CCAAGAGATGAGGGAACTGT	Chr 2	APOE-OTS10-F	F: AAAGCCCACAGGGTTACCAATA
			APOE-OTS10-R	R: TGGGTGTTTCTTGACAGTCCAAC
